# Supplementary material for: Energetic materials with fluorinated four-membered heterocyclic ring: 3,3′-difluoroazetidine (DFAZ) salts
Source: Royal Society of Chemistry journal article supplement (doi:10.1039/c9nj02569c), 2019-01-01
Supplement: c9nj02569c1.pdf [file c9nj02569c1.pdf]

Electronic Supplementary Information for Energetic Materials with  
Fluorinated Four-membered Heterocyclic Ring: 3, 3'-Difluoroazetidine  
(DFAZ) Salts

Jifeng Chen, Yi Yu, Shujuan Zhang, Yuchuan Li and Siping Pang

Figure S1 single-crystal X-ray structure (a) and crystal packing (b) of compound 2

Figure S2 single-crystal X-ray structure (a) and crystal packing (b) of compound 3

Figure S3 single-crystal X-ray structure (a) and crystal packing (b) of compound 4

Figure S4 single-crystal X-ray structure (a) and crystal packing (b) of compound 5

Figure S5 single-crystal X-ray structure (a) and crystal packing (b) of compound 6

Figure S6 IR spectra of compound 2

Figure S7 IR spectra of compound 3

Figure S8 IR spectra of compound 4

Figure S9 IR spectra of compound 5

Figure S10 IR spectra of compound 6

Figure S11 IR spectra of compound 7

Figure S12 IR spectra of compound 8

Figure S13 differential scanning calorimeter of compound 2

Figure S14 differential scanning calorimeter of compound 3

Figure S15 differential scanning calorimeter of compound 4

Figure S16 differential scanning calorimeter of compound 5

Figure S17 differential scanning calorimeter of compound 6

Figure S18 mass spectra of compound 2

Figure S19 mass spectra of compound 3

Figure S20 mass spectra of compound 4 (MS Screening mode for cations)

Figure S21 mass spectra of compound 4 (MS Screening mode for anions)

Figure S22 mass spectra of compound 5 (MS Screening mode for cations)

Figure S23 mass spectra of compound 5 (MS Screening mode for anions)

Figure S24 mass spectra of compound 6

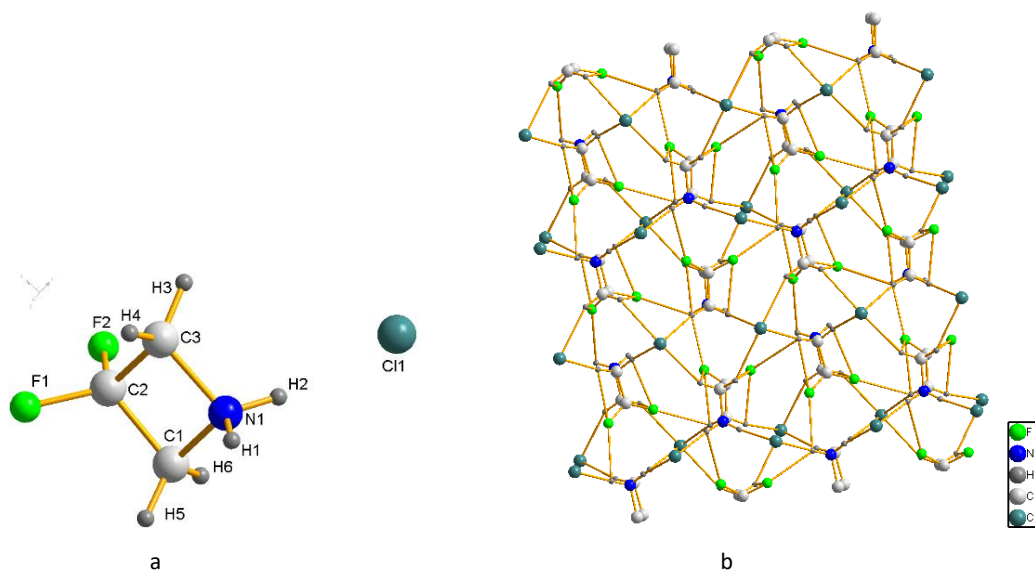

Figure S1 single-crystal X-ray structure (a) and crystal packing (b) of compound 2

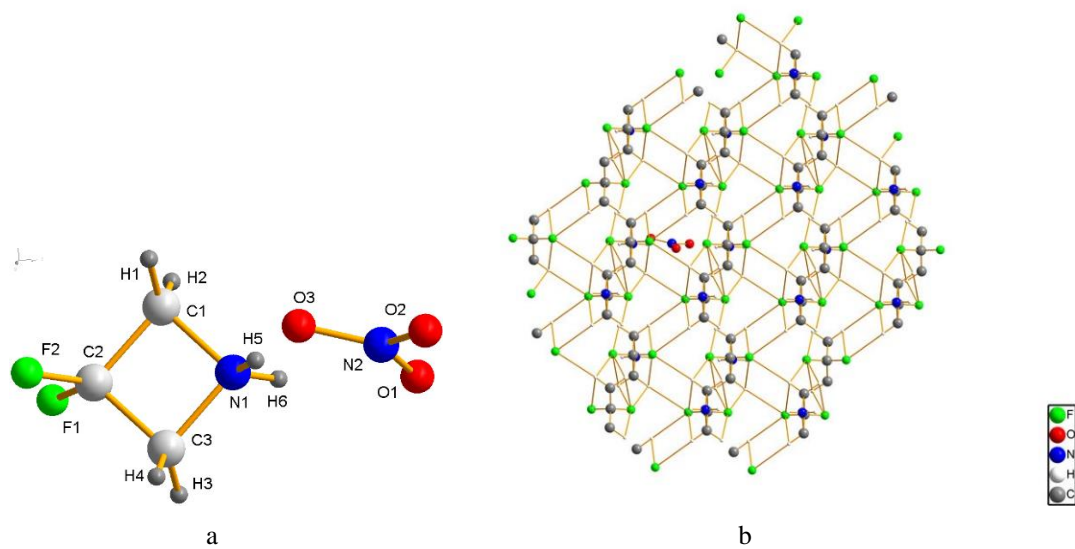

Figure S2 single-crystal X-ray structure (a) and crystal packing (b) of compound 3

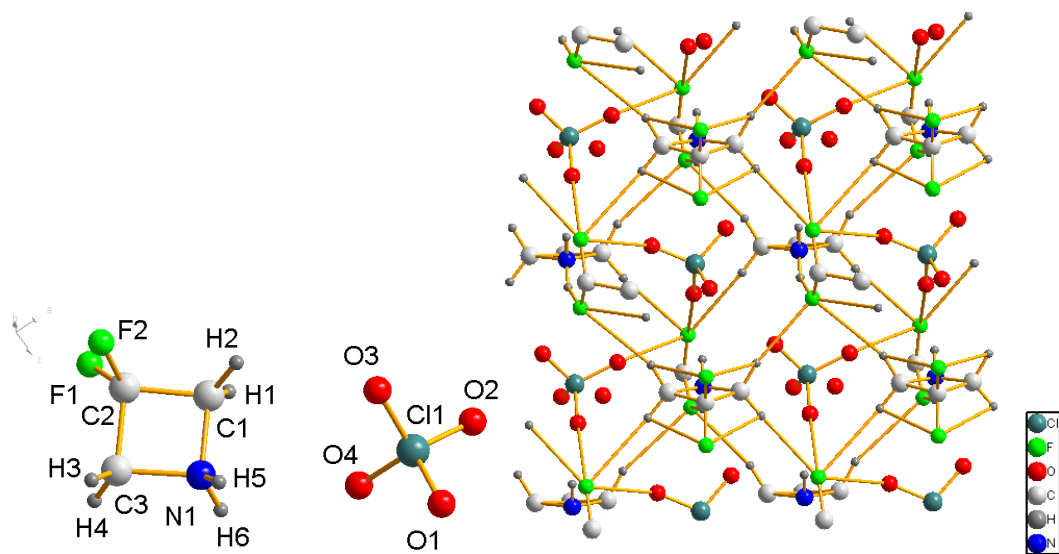

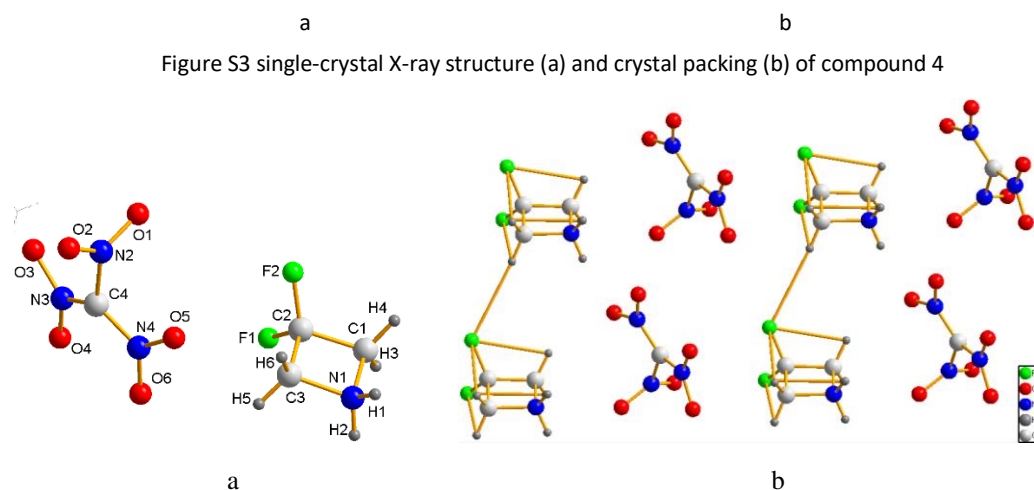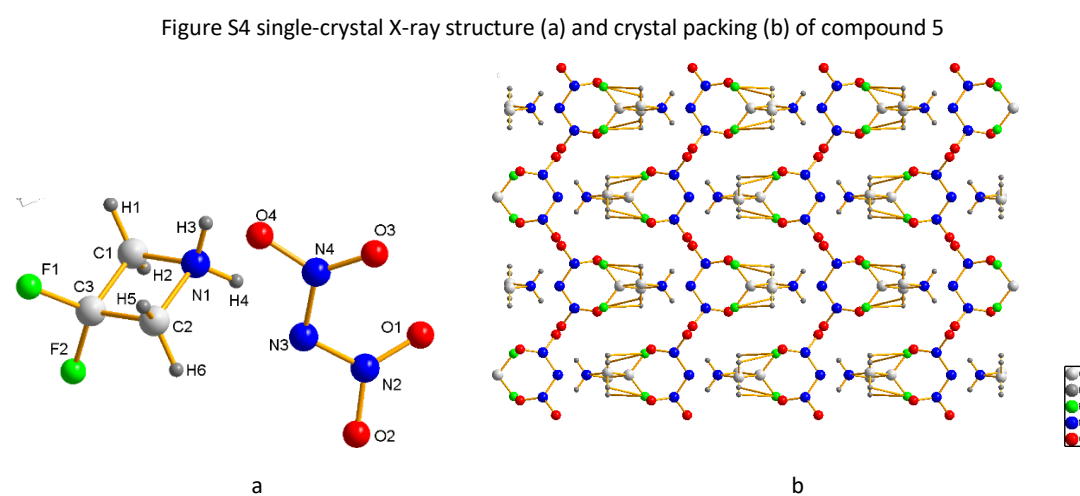

Figure S5 single-crystal X-ray structure (a) and crystal packing (b) of compound 6

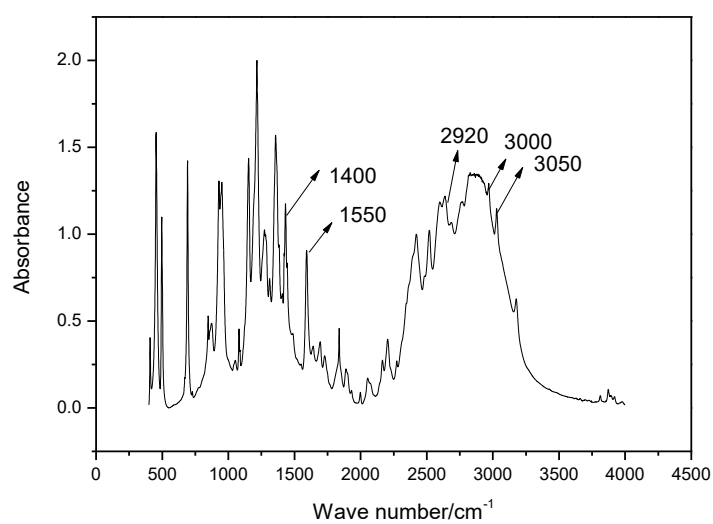

Figure S6 IR spectra of compound 2

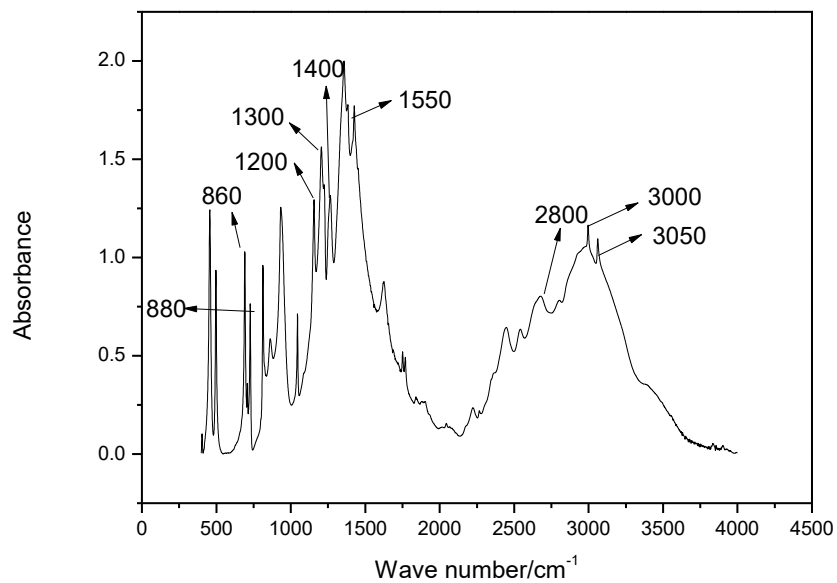

Figure S7 IR spectra of compound 3

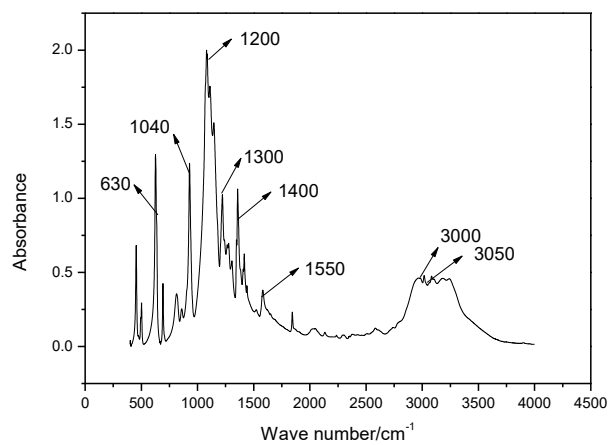

Figure S8 IR spectra of compound 4

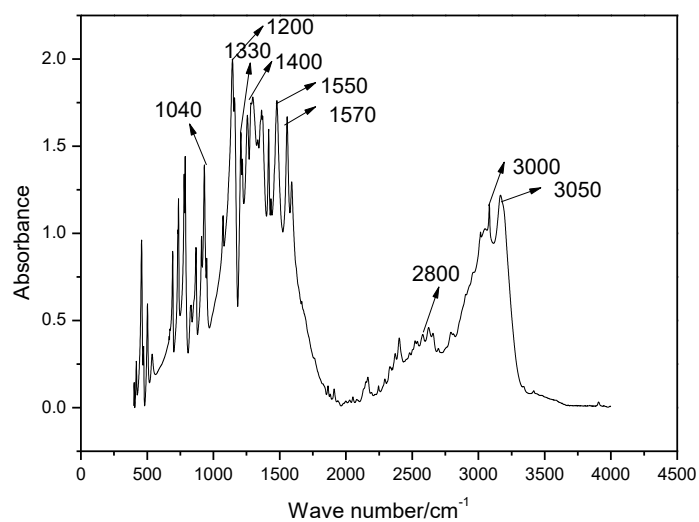

Figure S9 IR spectra of compound 5

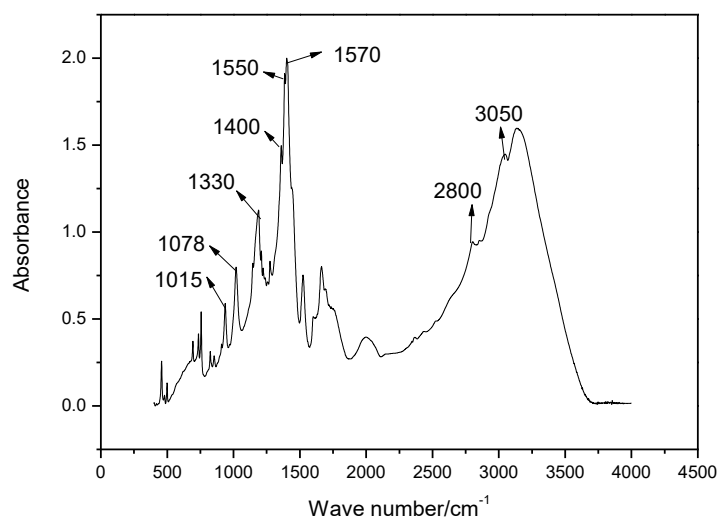

Figure S10 IR spectra of compound 6

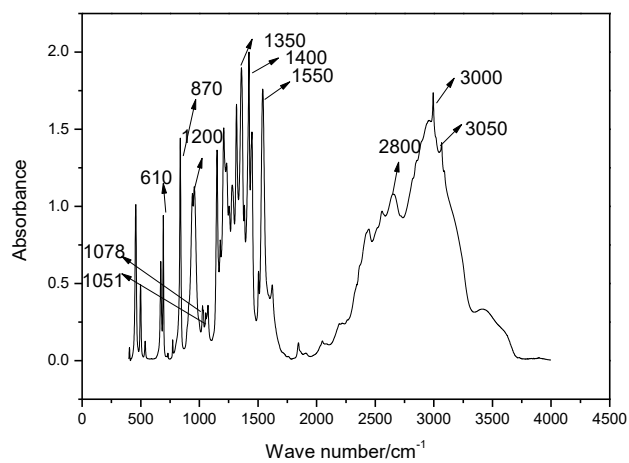

Figure S11 IR spectra of compound 7

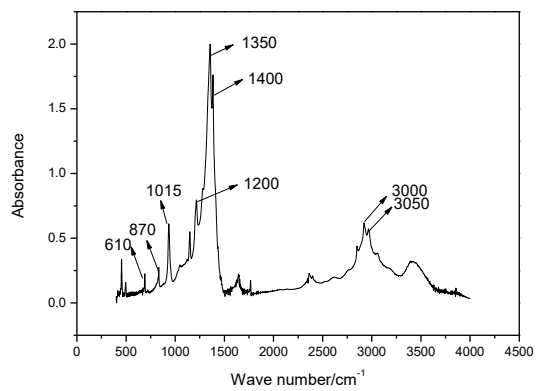

Figure S12 IR spectra of compound 8

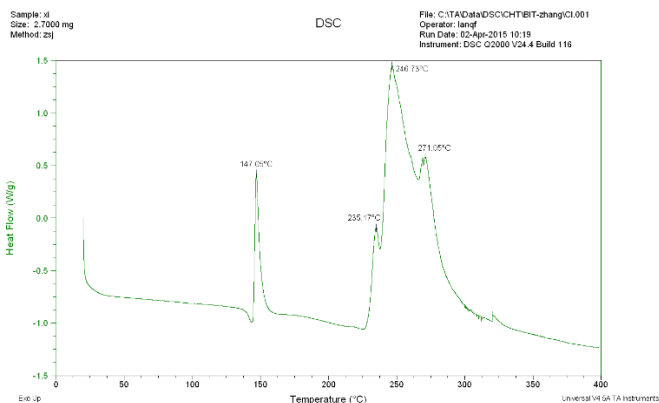

Figure S13 differential scanning calorimeter of compound 2

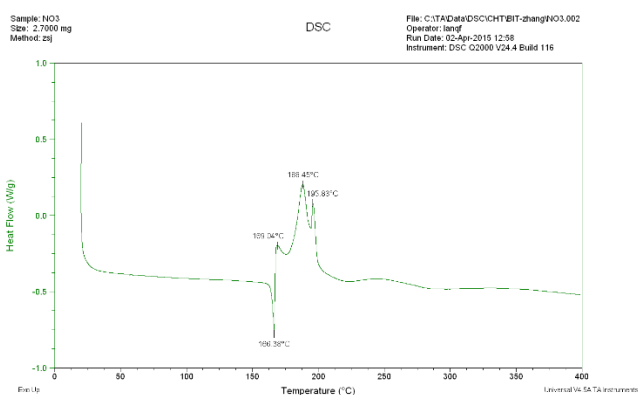

Figure S14 differential scanning calorimeter of compound 3

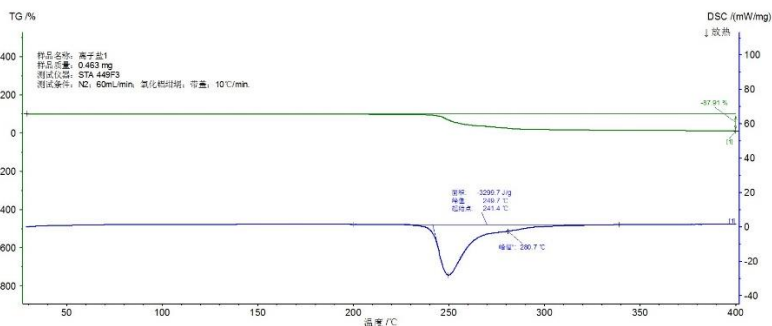

Figure S15 differential scanning calorimeter of compound 4

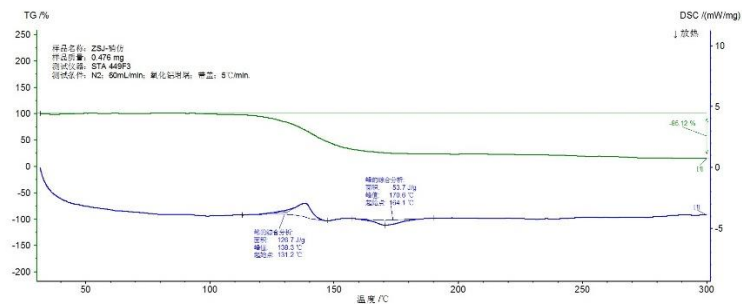

Figure S16 differential scanning calorimeter of compound 5

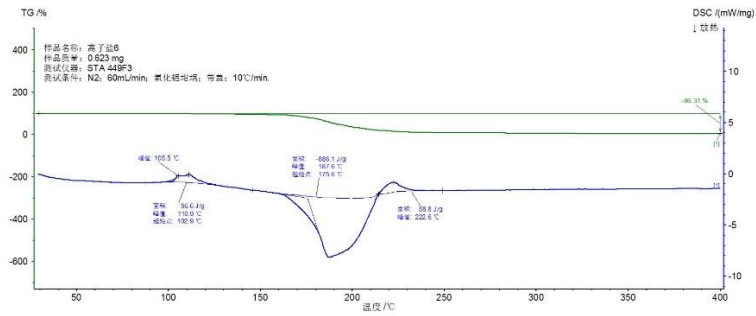

Figure S17 differential scanning calorimeter of compound 6

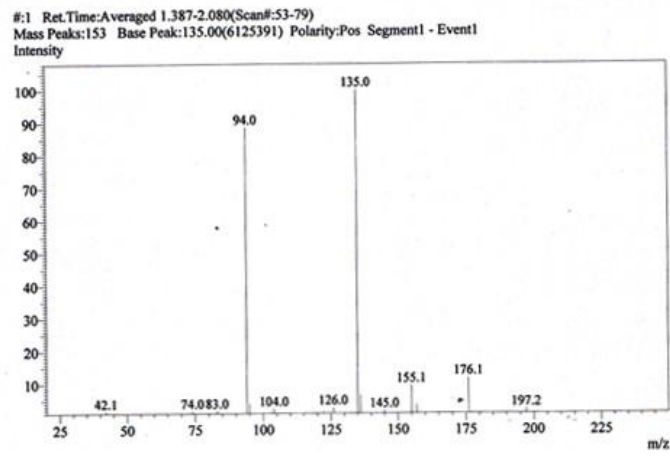

Figure S18 mass spectra of compound 2

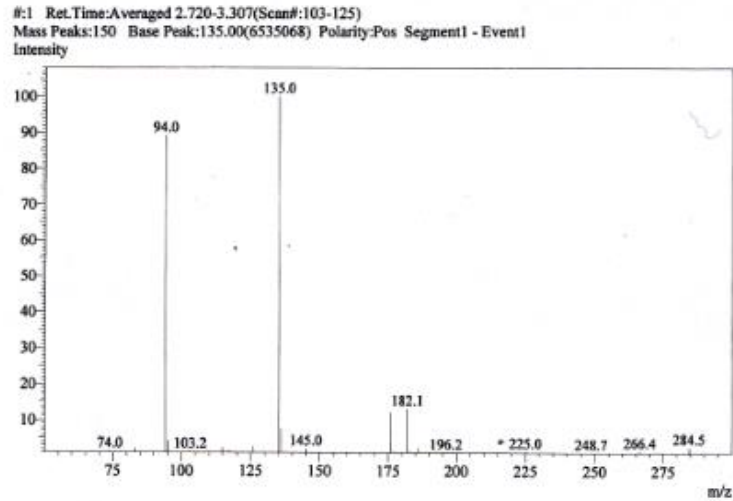

Figure S19 mass spectra of compound 3

ESI-MS Spectrum, 1

#1 Ret.Time:Averaged 1.813-2.293(Scan#:69-87)  
Mass Peaks:161 Base Peak:94.0(2042354) Polarity:Pos Segment1 - Event1  
Intensity

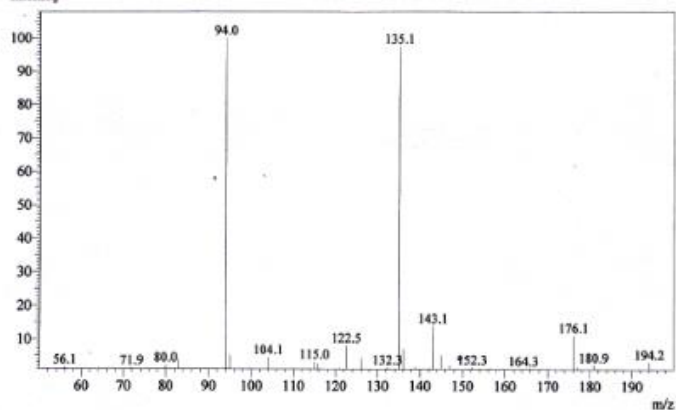

Figure S20 mass spectra of compound 4 (MS Screening mode for cations)

#2 Ret.Time:Averaged 1.840-2.320(Scan#:70-88)  
Mass Peaks:316 Base Peak:98.95(110232) Polarity:Neg Segment1 - Event2  
Intensity

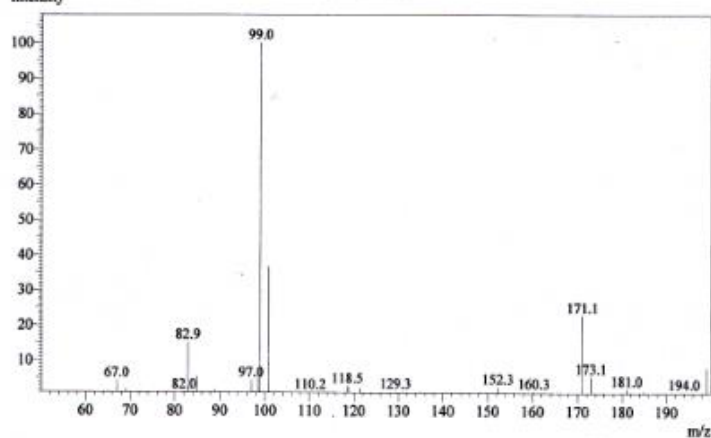

Figure S21 mass spectra of compound 4 (MS Screening mode for anions)

#1 Ret.Time:Averaged 1.333-1.867(Scan#:51-71)  
Mass Peaks:133 Base Peak:135.05(3221419) Polarity:Pos Segment1 - Event1  
Intensity

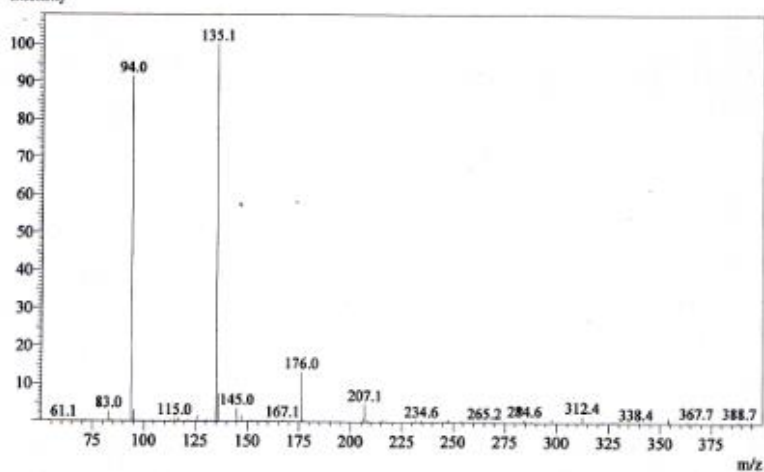

Figure S22 mass spectra of compound 5 (MS Screening mode for cations)



#2 Ret.Time:Averaged 1.360-1.893(Scan#:52-72)  
Mass Peaks:252 Base Peak:149.95(1606258) Polarity:Neg Segment1 - Event2

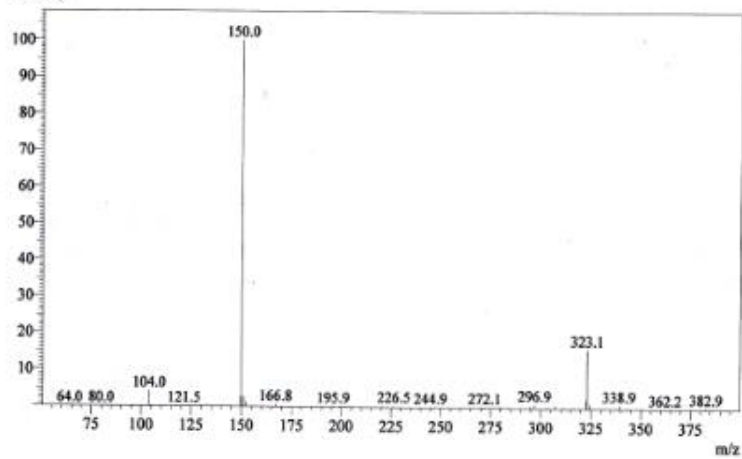

Figure S23 mass spectra of compound 5 (MS Screening mode for anions)

ESI-MS Spectrum, 6

#1 Ret.Time:Averaged 1.333-2.080(Scan#:51-79)  
Mass Peaks:212 Base Peak:135.05(3269941) Polarity:Pos Segment1 - Event1

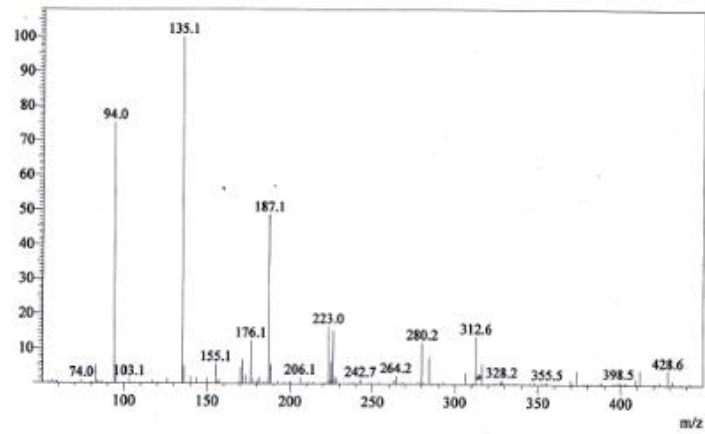

Figure S24 mass spectra of compound 6
